# Supplementary material for: Carbon-dot–hydrogel for enzyme-mediated bacterial detection
Source: Royal Society of Chemistry journal article supplement (doi:10.1039/c6ra25148j), 2017-01-01
Supplement: c6ra25148j1.pdf [file c6ra25148j1.pdf]

## Carbon-dot-hydrogel for enzyme-mediated bacterial detection

Sagarika Bhattacharya,<sup>a</sup> Sukhendu Nandi,<sup>a,#</sup> and Raz Jelinek<sup>\*a,b</sup>

<sup>a</sup> Department of Chemistry, Ben Gurion University of the Negev, Beer Sheva 84105, Israel.

E-mail: razj@bgu.ac.il; Fax: (+)972-8-6472943

<sup>b</sup> Ilse Katz Institute for Nanotechnology, Ben Gurion University of the Negev, Beer Sheva 84105, Israel.

# Present address: Ruhr Universitat Bochum, Universitaetsstrasse 150, D-44780, Bochum, Germany.

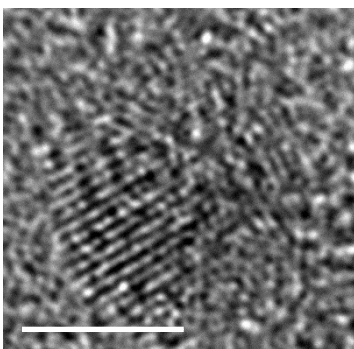

**Fig. S1** High resolution transmission electron microscopy (HRTEM) image of a representative carbon dot embedded within the hydrogel, showing the graphite crystal planes. Scale bar is 2 nm. HRTEM images were recorded on a 200 kV JEM-2100F transmission electron microscope (JEOL, Peabody, MA). For the HRTEM measurements, 0.5 mg of C-dots synthesized as described above were dissolved in 500 mL of chloroform, and 10 mL of the solution was placed upon an ultrathin carbon-film-coated Cu grid, dried at room temperature for 2 h, and imaged.

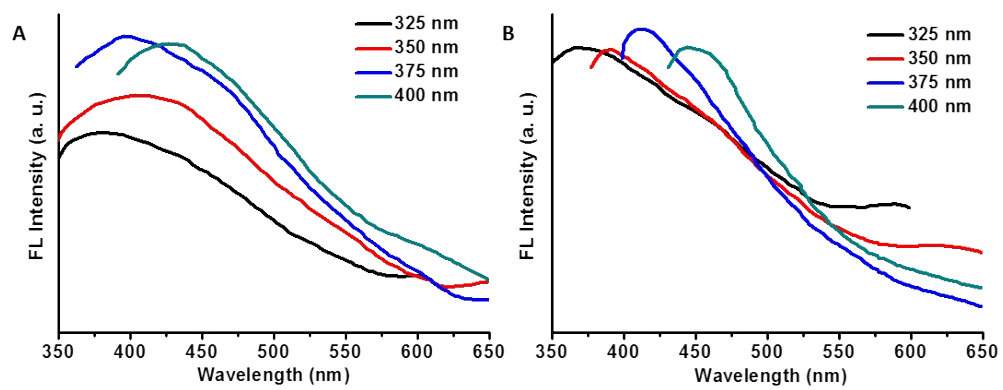

**Fig. S2** Photoluminescence spectra of C-dot embedded in hydro gel (**A**) and in solution excited at different wavelengths (**B**) ( $10 \text{ mg mL}^{-1}$ ) were recorded on FL920 spectrofluorimeter.
